# Supplementary material for: Microsatellites Cross-Species Amplification across Some African Cichlids
Source: PubMed Central journal article supplement (PMC3373121; doi:10.1155/2012/870935), 2012-06-04
Supplement: 870935.f1.pdf [file 870935.f1.pdf]

378

379 **SUPPLEMENTARY MATERIALS**

380

381

382

383  
384  
385  
386

**Table S1** Results of cross-species amplification at species level; for each loci, the amplification quality and the number of alleles per species are given; and overall loci, the average rates of amplification and polymorphism ( $p > 0.95$ ), and the mean number of alleles per locus are provided - expected null alleles (N) and amplification of echo-allele (echo – i.e. supplementary longer length amplified allele always co-appearing with a given allele) are also reported.

| Species<br>Loci | <i>Oreochromis</i>                          |                                               |                                               |                                               |                                               |                                              |                                             | <i>Sarotherodon</i>                           |                                               |                                               | <i>Tilapia</i>                                | <i>Hemichromis</i>                            | <i>Chromidotilapia</i>                      | <i>Haplochromis</i>                           |                                             |                                             |
|-----------------|---------------------------------------------|-----------------------------------------------|-----------------------------------------------|-----------------------------------------------|-----------------------------------------------|----------------------------------------------|---------------------------------------------|-----------------------------------------------|-----------------------------------------------|-----------------------------------------------|-----------------------------------------------|-----------------------------------------------|---------------------------------------------|-----------------------------------------------|---------------------------------------------|---------------------------------------------|
|                 | <i>niloticus</i>                            | <i>aureus</i>                                 | <i>mossambicus</i>                            | <i>shiranus</i>                               | <i>saka</i>                                   | <i>squamipinnis</i>                          | <i>macrochir</i>                            | <i>melanotheron</i>                           | <i>galilaeus</i>                              | <i>zillii</i>                                 | <i>dageti</i>                                 | <i>guineensis</i>                             | <i>bimaculatus</i>                          | <i>guntheri</i>                               | <i>sp. rockkribensis</i>                    |                                             |
| UNH-008         | quality ++<br># all. 3<br>all.range 206-222 | quality ++<br># all. 1<br>all.range 224       | quality ++<br># all. 1+N<br>all.range 198     | quality ++<br># all. 5<br>all.range 212-220   | quality ++<br># all. 6<br>all.range 206-236   | quality ++<br># all. 6<br>all.range 204-222  | quality ++<br># all. 2<br>all.range 201-203 | quality ++<br># all. 2<br>all.range 218-224   | quality ++<br># all. 6<br>all.range 203-221   | quality ++<br># all. 1<br>all.range 202       | quality ++<br># all. 1<br>all.range 202       | quality ++<br># all. 1<br>all.range 202       | quality ++<br># all. 2<br>all.range 215-216 | quality ++<br># all. 1<br>all.range 196       | quality ++<br># all. 1<br>all.range 206     |                                             |
| UNH-102         | quality ++<br># all. 4<br>all.range 147-175 | quality ++<br># all. N<br>all.range 198-222   | quality ++<br># all. 2+N<br>all.range 163-167 | quality ++<br># all. 7<br>all.range 147-177   | quality ++<br># all. 7+N<br>all.range 151-185 | quality ++<br># all. 7<br>all.range 151-177  | quality ++<br># all. 2<br>all.range 159-171 | quality ++<br># all. 5<br>all.range 151-167   | quality ++<br># all. 2+N<br>all.range 159-161 | quality ++<br># all. N<br>all.range 171-240   | quality ++<br># all. N<br>all.range 178-186   | quality ++<br># all. N<br>all.range 178-186   | quality ++<br># all. N<br>all.range 178-186 | quality ++<br># all. 2+N<br>all.range 157-161 | quality ++<br># all. 1<br>all.range 141     | quality ++<br># all. 1<br>all.range 132     |
| UNH-103         | quality ++<br># all. 3<br>all.range 206-220 | quality ++<br># all. 2<br>all.range 198-222   | quality ++<br># all. 3<br>all.range 182-224   | quality ++<br># all. 8<br>all.range 206-252   | quality ++<br># all. 10<br>all.range 180-240  | quality ++<br># all. 10<br>all.range 184-260 | quality ++<br># all. 3<br>all.range 182-234 | quality ++<br># all. 5<br>all.range 171-240   | quality ++<br># all. 4+N<br>all.range 178-186 | quality ++<br># all. N<br>all.range 171-240   | quality ++<br># all. N<br>all.range 178-186   | quality ++<br># all. N<br>all.range 178-186   | quality ++<br># all. N<br>all.range 178-186 | quality ++<br># all. N<br>all.range 178-186   | quality ++<br># all. N<br>all.range 178-186 | quality ++<br># all. N<br>all.range 178-186 |
| UNH-106         | quality ++<br># all. 4<br>all.range 131-141 | quality ++<br># all. 4<br>all.range 155-189   | quality ++<br># all. 2+N<br>all.range 115-117 | quality ++<br># all. 6<br>all.range 155-171   | quality ++<br># all. 4<br>all.range 127-147   | quality ++<br># all. 5<br>all.range 119-149  | quality ++<br># all. 1<br>all.range 119     | quality ++<br># all. 4+N<br>all.range 125-135 | quality ++<br># all. 5+N<br>all.range 125-143 | quality ++<br># all. 2<br>all.range 125-173   | quality ++<br># all. 1<br>all.range 123       | quality ++<br># all. 4+N<br>all.range 137-163 | quality ++<br># all. 1+N<br>all.range 133   | quality ++<br># all. 4<br>all.range 137-147   | quality ++<br># all. 3<br>all.range 157-163 |                                             |
| UNH-115         | quality ++<br># all. 3<br>all.range 128-146 | quality ++<br># all. 1<br>all.range 122       | quality ++<br># all. 3<br>all.range 112-140   | quality ++<br># all. 4<br>all.range 122-131   | quality ++<br># all. 7<br>all.range 112-132   | quality ++<br># all. 3<br>all.range 120-127  | quality ++<br># all. 1<br>all.range 118     | quality ++<br># all. 1<br>all.range 124       | quality ++<br># all. 5+N<br>all.range 114-128 | quality ++<br># all. 1<br>all.range 128       | quality ++<br># all. 1<br>all.range 128       | quality ++<br># all. 2<br>all.range 124-128   | quality ++<br># all. 1<br>all.range 100     | quality ++<br># all. 1<br>all.range 120       | quality ++<br># all. 1<br>all.range 120     | quality ++<br># all. N<br>all.range 120     |
| UNH-117         | quality ++<br># all. 1<br>all.range 120     | quality ++<br># all. 1<br>all.range 120       | quality ++<br># all. 1<br>all.range 120       | quality ++<br># all. 1+N<br>all.range 120     | quality ++<br># all. 2<br>all.range 118-120   | quality ++<br># all. 1<br>all.range 120      | quality ++<br># all. 1<br>all.range 120     | quality ++<br># all. 2<br>all.range 120-124   | quality ++<br># all. 2<br>all.range 116-122   | quality ++<br># all. 1<br>all.range 112       | quality ++<br># all. 1<br>all.range 116       | quality ++<br># all. 1<br>all.range 116       | quality ++<br># all. 1<br>all.range 128     | quality ++<br># all. 1<br>all.range 108       | quality ++<br># all. 1<br>all.range 108     | quality ++<br># all. 1<br>all.range 146     |
| UNH-120         | quality -<br># all. 5<br>all.range 189-215  | quality -<br># all. 3<br>all.range 199-201    | quality -<br># all. 2<br>all.range 199-203    | quality -<br># all. 8<br>all.range 187-201    | quality -<br># all. 11<br>all.range 185-209   | quality -<br># all. 8<br>all.range 183-209   | quality -<br># all. 2<br>all.range 209      | quality -<br># all. 2<br>all.range 175-217    | quality -<br># all. 2<br>all.range 183-209    | quality -<br># all. 1<br>all.range 183-209    | quality -<br># all. 1<br>all.range 183-209    | quality -<br># all. 1<br>all.range 183-209    | quality -<br># all. 1<br>all.range 183-209  | quality -<br># all. 1<br>all.range 183-209    | quality -<br># all. 1<br>all.range 183-209  | quality -<br># all. 1<br>all.range 183-209  |
| UNH-123         | quality ++<br># all. 6<br>all.range 154-212 | quality ++<br># all. 4+N<br>all.range 195-232 | quality ++<br># all. 3<br>all.range 184-206   | quality ++<br># all. 3+N<br>all.range 162-174 | quality ++<br># all. 4<br>all.range 162-184   | quality ++<br># all. 6<br>all.range 166-178  | quality ++<br># all. 2<br>all.range 176-180 | quality ++<br># all. 2<br>all.range 153-162   | quality ++<br># all. 5<br>all.range 162-196   | quality ++<br># all. N<br>all.range 156-162   | quality ++<br># all. 2<br>all.range 156-162   | quality ++<br># all. 1<br>all.range 162       | quality ++<br># all. 1<br>all.range 144     | quality ++<br># all. 1<br>all.range 142       | quality ++<br># all. 1<br>all.range 142     | quality ++<br># all. 1<br>all.range 160     |
| UNH-124         | quality ++<br># all. 4<br>all.range 295-313 | quality ++<br># all. N<br>all.range 199-201   | quality ++<br># all. 3<br>all.range 307-313   | quality ++<br># all. N<br>all.range 187-201   | quality ++<br># all. 1<br>all.range 185-209   | quality ++<br># all. 2<br>all.range 183-209  | quality ++<br># all. 2<br>all.range 209     | quality ++<br># all. 1<br>all.range 175-217   | quality ++<br># all. 1<br>all.range 183-209   | quality ++<br># all. 2+N<br>all.range 310-324 | quality ++<br># all. 2+N<br>all.range 310-321 | quality ++<br># all. N<br>all.range 156-162   | quality ++<br># all. N<br>all.range 156-162 | quality ++<br># all. N<br>all.range 156-162   | quality ++<br># all. N<br>all.range 156-162 | quality ++<br># all. N<br>all.range 156-162 |
| UNH-125         | quality ++<br># all. 7<br>all.range 134-170 | quality ++<br># all. 1<br>all.range 158       | quality ++<br># all. N<br>all.range 199-203   | quality ++<br># all. 3<br>all.range 138-142   | quality ++<br># all. N<br>all.range 185-209   | quality ++<br># all. N<br>all.range 183-209  | quality ++<br># all. 2<br>all.range 174-198 | quality ++<br># all. 4<br>all.range 142-166   | quality ++<br># all. 2+N<br>all.range 156-158 | quality ++<br># all. 1<br>all.range 154       | quality ++<br># all. 3<br>all.range 158-162   | quality ++<br># all. 2<br>all.range 154-186   | quality ++<br># all. N<br>all.range 193-201 | quality ++<br># all. N<br>all.range 203       | quality ++<br># all. 1<br>all.range 203     | quality ++<br># all. 1<br>all.range 237-253 |
| UNH-129         | quality ++<br># all. 7<br>all.range 189-215 | quality ++<br># all. 2<br>all.range 199-201   | quality ++<br># all. 2<br>all.range 199-203   | quality ++<br># all. 4<br>all.range 187-201   | quality ++<br># all. 6<br>all.range 185-209   | quality ++<br># all. 6<br>all.range 183-209  | quality ++<br># all. 1<br>all.range 209     | quality ++<br># all. 5<br>all.range 175-217   | quality ++<br># all. 2+N<br>all.range 183-209 | quality ++<br># all. N<br>all.range 183-209   | quality ++<br># all. N<br>all.range 183-209   | quality ++<br># all. N<br>all.range 183-209   | quality ++<br># all. 2<br>all.range 193-201 | quality ++<br># all. 1<br>all.range 203       | quality ++<br># all. 1<br>all.range 203     | quality ++<br># all. 2<br>all.range 237-253 |

387  
388  
389  
390

391 **Table S1 (continuation)**

| Species<br>Loci | <i>Oreochromis</i> |               |                    |                 |             |                     |                  | <i>Sarotherodon</i> |                  |               | <i>Tilapia</i> |                   | <i>Hemichromis</i> | <i>Chromidotilapia</i> | <i>Haplochromis</i>      |         |
|-----------------|--------------------|---------------|--------------------|-----------------|-------------|---------------------|------------------|---------------------|------------------|---------------|----------------|-------------------|--------------------|------------------------|--------------------------|---------|
|                 | <i>niloticus</i>   | <i>aureus</i> | <i>mossambicus</i> | <i>shiranus</i> | <i>saka</i> | <i>squamipinnis</i> | <i>macrochir</i> | <i>melanotheron</i> | <i>galilaeus</i> | <i>zillii</i> | <i>dagei</i>   | <i>guineensis</i> | <i>bimaculatus</i> | <i>guntheri</i>        | <i>sp. rockkribensis</i> |         |
| <b>UNH-130</b>  | quality            | ++            | ++                 | -               | ++          | +(echo)             | +(echo)          | ++                  | ++               | ++            | ++             | ++                |                    |                        | ++                       |         |
|                 | # all.             | 7             | 2                  | 2+N             | 5           | 4+N                 | 4                | 2                   | 1+N              | 5             | 1+N            | 2                 | N                  | N                      | 2                        |         |
|                 | all.range          | 178-236       | 183-189            | 179-236         | 179-232     | 174-216             | 174-200          | 176-186             | 176              | 184-242       | 183            | 183               | 181-187            |                        | 180-230                  |         |
| <b>UNH-131</b>  | quality            | +             | --                 | -               | -           | -                   | -                | +                   | -                | --            | --             | --                | --                 | --                     | --                       |         |
|                 | # all.             | 4             | N                  | N               | 3           | 1                   | 2                | 2                   | 3                | N             | N              | N                 | N                  | N                      | N                        |         |
|                 | all.range          |               |                    |                 |             |                     |                  |                     |                  |               |                |                   |                    |                        |                          |         |
| <b>UNH-132</b>  | quality            | ++            | ++                 | ++              | ++          | ++                  | ++               | ++                  | ++               | ++            | ++             | ++                |                    |                        |                          |         |
|                 | # all.             | 2             | 3                  | 3               | 5           | 1                   | 1                | 2                   | 1+N              | 4+N           | N              | N                 | N                  | N                      | N                        |         |
|                 | all.range          | 118-122       | 124-134            | 122-132         | 114-130     | 107                 | 107              | 107-111             | 100              | 110-122       |                |                   |                    |                        |                          |         |
| <b>UNH-135</b>  | quality            | +(echo)       | +(echo)            | +(echo)         | +(echo)     | +(echo)             | +(echo)          | +(echo)             | +(echo)          | +             | +              | +                 |                    |                        |                          |         |
|                 | # all.             | 6             | 2                  | 4               | 3           | 9                   | 8                | 3                   | 5                | 7             | 3              | 5                 | N                  | N                      | N                        |         |
|                 | all.range          | 126-274       | 162-168            | 124-162         | 126-168     | 124-159             | 129-276          | 128-174             | 126-211          | 160-286       | 232-284        | 266-274           | 246-280            |                        |                          |         |
| <b>UNH-138</b>  | quality            | ++            | ++                 | ++              | ++          | ++                  | ++               | ++                  | ++               | ++            | ++             | ++                |                    |                        | +                        |         |
|                 | # all.             | 7             | 1                  | 1               | 8           | 8                   | 8                | 3                   | 2                | 9             | 5              | 3+N               | 5                  | N                      | N                        | 1+N     |
|                 | all.range          | 160-198       | 180                | 150             | 168-218     | 178-238             | 172-250          | 178-186             | 154-164          | 144-232       | 148-230        | 144-154           | 154-165            |                        |                          | 158     |
| <b>UNH-142</b>  | quality            | ++            | ++                 | ++              | ++          | ++                  | ++               | ++                  | ++               | ++            | ++             | ++                | +                  |                        | +                        |         |
|                 | # all.             | 3             | 1                  | 4               | 5           | 8                   | 5+N              | 1                   | 3                | 4             | 1              | 1                 | 7                  | 1                      | N                        | 2       |
|                 | all.range          | 156-160       | 156                | 146-172         | 152-168     | 156-192             | 152-178          | 172                 | 146-160          | 142-154       | 142            | 142               | 142-186            | 142                    |                          | 170-176 |
| <b>UNH-146</b>  | quality            | ++            | ++                 | ++              | ++          | ++                  | ++               | ++                  | ++               | ++            | ++             | ++                |                    | +                      |                          |         |
|                 | # all.             | 3             | 1                  | 1+N             | 1           | 6                   | 4+N              | 2                   | 3+N              | 4             | 2              | 1                 | 3                  | N                      | 1                        | N       |
|                 | all.range          | 123-131       | 125                | 123             | 125         | 129-145             | 129-137          | 133-149             | 121-133          | 111-147       | 111-115        | 111               | 111-117            |                        | 113                      |         |
| <b>UNH-149</b>  | quality            | ++            | ++                 | ++              | ++          | ++                  | ++               | ++                  | ++               | +(echo)       | ++             | --                | ++                 | +                      | ++                       |         |
|                 | # all.             | 4             | 3                  | 1               | 8           | 6                   | 5                | 3                   | 3                | 10            | 2              | 7                 | 7                  | 5                      | 3                        | N       |
|                 | all.range          | 145-161       | 149-193            | 147             | 159-200     | 145-157             | 145-159          | 183-225             | 163-177          | 143-203       | 161-167        | 153-221           | 149-183            | 161-177                | 159-163                  |         |
| <b>UNH-154</b>  | quality            | ++            | +(echo)            | ++              | ++          | ++                  | ++               | ++                  | ++               | ++            | ++             | ++                | +                  | ++                     | ++                       |         |
|                 | # all.             | 8             | 1+N                | 1               | 9           | 9                   | 9                | 2                   | 6                | 7             | 2+N            | 2                 | 3                  | 2                      | 1                        | N       |
|                 | all.range          | 100-174       | 124                | 128             | 108-164     | 108-166             | 112-176          | 138-158             | 102-120          | 100-136       | 118-158        | 104-108           | 98-104             | 98-112                 | 114                      |         |
| <b>UNH-159</b>  | quality            | ++            | ++                 | ++              | ++          | +                   | +                | ++                  | ++               | ++            | ++             | ++                | -                  | ++                     | -                        |         |
|                 | # all.             | 5+N           | 2                  | 3               | 4+N         | 7                   | 8                | 2                   | 3                | 5             | 2              | 3                 | 5                  | 1                      | 1                        | 1+N     |
|                 | all.range          | 229-267       | 239-243            | 229-257         | 221-247     | 227-267             | 227-249          | 255-259             | 217-237          | 229-241       | 208-218        | 231-234           | 210-245            | 209                    | 205                      | 211     |
| <b>UNH-162</b>  | quality            | ++            | ++                 | ++              | ++          | ++                  | ++               | ++                  | ++               | ++            | ++             | +                 | --                 | +                      | N                        |         |
|                 | # all.             | 6             | 2                  | 2               | 8           | 9                   | 9                | 1                   | 2                | 7             | 4              | 4                 | 6                  | 2                      | 2                        | N       |
|                 | all.range          | 200-238       | 198-200            | 208-230         | 186-216     | 206-252             | 204-242          | 194                 | 181-210          | 191-230       | 212-244        | 125-229           | 205-240            | 209-217                | 202-204                  |         |

392  
393  
394  
395

396 **Table S1 (continuation bis)**

| Species<br>Loci           | <i>Oreochromis</i> |               |                    |                 |             |                     |                  | <i>Sarotherodon</i> |                  |               | <i>Tilapia</i> |                   | <i>Hemichromis</i> | <i>Chromidotilapia</i> | <i>Haplochromis</i>      |
|---------------------------|--------------------|---------------|--------------------|-----------------|-------------|---------------------|------------------|---------------------|------------------|---------------|----------------|-------------------|--------------------|------------------------|--------------------------|
|                           | <i>niloticus</i>   | <i>aureus</i> | <i>mossambicus</i> | <i>shiranus</i> | <i>saka</i> | <i>squamipinnis</i> | <i>macrochir</i> | <i>melanotheron</i> | <i>galilaeus</i> | <i>zillii</i> | <i>dageti</i>  | <i>guineensis</i> | <i>bimaculatus</i> | <i>guntheri</i>        | <i>sp. rockkribensis</i> |
| <b>UNH-169</b>            | quality ++         | ++            | ++                 | +               | +           | +                   | ++               | ++                  | ++               | ++            | ++             | ++                | ++                 | ++                     | ++                       |
|                           | # all. 8           | 3             | 3                  | 5               | 9           | 9                   | 1                | 4+N                 | 5                | 1             | 1+N            | 2                 | 1                  | 1                      | 2                        |
|                           | all.range 124-166  | 132-192       | 148-168            | 152-184         | 144-220     | 144-240             | 140              | 136-168             | 136-156          | 136           | 136            | 134-136           | 144                | 172                    | 134-144                  |
| <b>UNH-173</b>            | quality ++         | ++            | ++                 | +               | +           | +                   | ++               | ++                  | -                | ++            | -              | -                 | N                  | N                      | N                        |
|                           | # all. 2           | 2             | 1                  | N               | 3+N         | 5+N                 | 1                | 1+N                 | 4                | 1             | 3+N            | 2                 | N                  | N                      | N                        |
|                           | all.range 172-188  | 174-180       | 172                | 178-188         | 176-188     | 160                 | 154              | 136-172             | 124              | 136-142       | 124-140        |                   |                    |                        |                          |
| <b>UNH-174</b>            | quality ++         | ++            | ++                 | ++              | ++          | ++                  | ++               | ++                  | ++               | +             | +              | ++                | N                  | N                      | ++                       |
|                           | # all. 4           | 1             | 3                  | 2+N             | 1           | 1                   | 1                | 1                   | 5                | 3             | 1              | 3                 | N                  | N                      | 1                        |
|                           | all.range 165-187  | 153           | 151-181            | 146-151         | 149         | 149                 | 155              | 151                 | 149-161          | 157-161       | 159            | 165-181           |                    |                        | 154                      |
| <b>UNH-189</b>            | quality ++         | ++            | ++                 | ++              | +           | ++                  | ++               | ++                  | -                | ++            | ++             | -                 | N                  | -                      | N                        |
|                           | # all. 3           | 3             | 2                  | 8               | 7           | 6                   | 2+N              | 3                   | 7                | 2             | 6              | 6                 | N                  | 2                      | N                        |
|                           | all.range 161-190  | 152-184       | 146-184            | 142-171         | 150-198     | 154-208             | 146-156          | 155-161             | 149-198          | 140-144       | 149-203        | 135-173           |                    | 135-138                |                          |
| <b>UNH-190</b>            | quality ++         | ++            | ++                 | ++              | ++          | ++                  | ++               | ++                  | ++               | ++            | +              | +                 | N                  | ++                     | -                        |
|                           | # all. 2           | 1             | 1                  | 8               | 3           | 2+N                 | 2                | 1                   | 2+N              | 3             | N              | 1+N               | N                  | 1                      | 1                        |
|                           | all.range 168-177  | 170           | 141                | 143-192         | 141-145     | 141-143             | 141-149          | 145                 | 147-159          | 186-198       | 202            |                   |                    | 133                    | 198                      |
| <b>UNH-193</b>            | quality ++         | ++            | ++                 | ++              | -- (or nul) | -- (or nul)         | -- (or nul)      | ++                  | -- (or nul)      | ++            | ++             | --                | --                 | -- (or nul)            | --                       |
|                           | # all. 3           | 2             | 2                  | 2               | N           | N                   | N                | 3                   | N                | 1             | 1              | N                 | N                  | N                      | N                        |
|                           | all.range          |               |                    |                 |             |                     |                  |                     |                  |               |                |                   |                    |                        |                          |
| <b>UNH-197</b>            | quality + (echo)   | + (echo)      | + (echo)           | ++              | + (echo)    | + (echo)            | ++               | + (echo)            | -                | +             | -              | -                 | N                  | -                      | -                        |
|                           | # all. 6           | 2             | 2                  | 6               | 7           | 9                   | 1                | 5                   | 9                | 4             | 5+N            | 6+N               | N                  | 3+N                    | 2                        |
|                           | all.range 156-206  | 174-186       | 170-184            | 200-218         | 164-198     | 154-210             | 190              | 202-228             | 188-222          | 180-198       | 191-218        | 178-199           |                    | 164-194                | 214-220                  |
| <b>UNH-207</b>            | quality + (echo)   | ++            | ++                 | ++              | ++          | ++                  | ++               | + (echo)            | + (echo)         | ++            | ++             | ++                | N                  | ++                     | +                        |
|                           | # all. 3           | 1             | 2+N                | 2               | 5           | 8                   | 1                | 4                   | 7                | 2             | 3              | 5                 | N                  | 1                      | 2                        |
|                           | all.range 140-158  | 148           | 110-116            | 116-148         | 116-164     | 112-166             | 116              | 118-154             | 114-166          | 128-134       | 112-174        | 114-144           |                    | 90                     | 184-198                  |
| <b>UNH-211</b>            | quality ++         | ++            | ++                 | ++              | ++          | ++                  | ++               | ++                  | ++               | ++            | -              | -                 | N                  | N                      | N                        |
|                           | # all. 6           | 2             | 2                  | 7               | 9           | 8                   | 2                | 8                   | 5+N              | 2             | 1              | 4                 | N                  | N                      | N                        |
|                           | all.range 128-162  | 134-162       | 144-160            | 144-180         | 142-176     | 124-184             | 128-158          | 154-194             | 136-170          | 82-84         | 82             | 84-194            |                    |                        |                          |
| <b>UNH-216</b>            | quality ++         | ++            | ++                 | ++              | ++          | ++                  | ++               | ++                  | ++               | ++            | +              | ++                | --                 | N                      | ++                       |
|                           | # all. 2           | 1             | 2                  | 9               | 7+N         | 8                   | 1                | 4                   | 7                | 2             | 7              | 6                 | 4+N                | N                      | 2                        |
|                           | all.range 126-138  | 128           | 160-174            | 152-178         | 160-186     | 146-168             | 176              | 136-170             | 136-190          | 160-174       | 138-168        | 150-174           | 168-212            |                        | 160-190                  |
| <b>amplification rate</b> | 97%                | 88%           | 88%                | 88%             | 88%         | 88%                 | 91%              | 97%                 | 75%              | 75%           | 63%            | 63%               | 19%                | 47%                    | 38%                      |
| <b>P(0.95)</b>            | 97%                | 57%           | 71%                | 93%             | 89%         | 89%                 | 55%              | 77%                 | 96%              | 42%           | 60%            | 80%               | 50%                | 20%                    | 50%                      |
| <b>mean.all/Locus</b>     | 4.3                | 1.8           | 2.1                | 5.2             | 5.9         | 5.8                 | 1.7              | 2.8                 | 4                | 1.5           | 2.4            | 3.6               | 2.3                | 1.4                    | 1.6                      |

397

398

399

400 **Table S2** Cross-species amplification results per taxonomic groups (genus, tribe & total  
 401 of species) with the number of alleles, calculated i) per locus and ii) over all loci (with  
 402 amplification and polymorphism rates, mean alleles number per locus & mean alleles  
 403 number per locus and species); expected null alleles (N) are reported.

404

| <b>Taxonomic groups<br/>Loci</b> | <i>Oreochromis</i> | <i>Sarotherodon</i> | <i>Tilapia</i> | Tilapiines | non-Tilapiines | <b>Total</b> |
|----------------------------------|--------------------|---------------------|----------------|------------|----------------|--------------|
| UNH-008                          | 16+N               | 6                   | 1              | 20+N       | 4              | 22+N         |
| UNH-102                          | 16+N               | 5                   | 0+N            | 17+N       | 4+N            | 19+N         |
| UNH-103                          | 27                 | 8                   | 0+N            | 31+N       | 0+N            | 31+N         |
| UNH-106                          | 20                 | 6+N                 | 7+N            | 28+N       | 8+N            | 30+N         |
| UNH-115                          | 12                 | 4                   | 3              | 14         | 2+N            | 15+N         |
| UNH-117                          | 2+N                | 3                   | 2              | 6+N        | 3              | 9+N          |
| UNH-123                          | 20+N               | 6                   | 2+N            | 23+N       | 3              | 26+N         |
| UNH-124                          | 6+N                | 5                   | 2+N            | 12+N       | 0+N            | 12+N         |
| UNH-125                          | 12+N               | 4+N                 | 5              | 16+N       | 1+N            | 17+N         |
| UNH-129                          | 16                 | 6                   | 0+N            | 19+N       | 5              | 21+N         |
| UNH-130                          | 19+N               | 5+N                 | 4+N            | 25+N       | 2+N            | 26+N         |
| UNH-132                          | 12                 | 5+N                 | 0+N            | 14+N       | 0+N            | 14+N         |
| UNH-135                          | 23                 | 7                   | 8              | 33         | 0+N            | 33+N         |
| UNH-138                          | 25                 | 8                   | 11+N           | 38+N       | 1+N            | 38+N         |
| UNH-142                          | 15+N               | 4                   | 7              | 18+N       | 3+N            | 18+N         |
| UNH-146                          | 9+N                | 5                   | 4              | 16+N       | 1+N            | 16+N         |
| UNH-149                          | 19                 | 9                   | 14             | 31         | 6+N            | 31+N         |
| UNH-154                          | 28+N               | 8                   | 6              | 32+N       | 3+N            | 33+N         |
| UNH-159                          | 17+N               | 7                   | 9              | 26+N       | 3+N            | 29+N         |
| UNH-162                          | 22                 | 7                   | 10             | 34         | 4+N            | 35+N         |
| UNH-169                          | 28                 | 7+N                 | 2+N            | 31+N       | 3              | 31+N         |
| UNH-173                          | 10+N               | 3+N                 | 5+N            | 17+N       | 0+N            | 17+N         |
| UNH-174                          | 10+N               | 3                   | 4              | 11+N       | 1+N            | 12+N         |
| UNH-189                          | 21+N               | 8                   | 12             | 36+N       | 2+N            | 37+N         |
| UNH-190                          | 14+N               | 3                   | 4+N            | 18+N       | 2+N            | 19+N         |
| UNH-197                          | 25                 | 11                  | 13+N           | 36+N       | 5+N            | 38+N         |
| UNH-207                          | 13+N               | 8                   | 9              | 23+N       | 3+N            | 26+N         |
| UNH-211                          | 24                 | 11                  | 5              | 31         | 0+N            | 31+N         |
| UNH-216                          | 18+N               | 7                   | 11             | 25+N       | 6+N            | 29+N         |
| <b>amplification rate</b>        | 88%                | 86%                 | 67%            | 82%        | 34%            | 72%          |
| <b>P (0.95)</b>                  | 76%                | 85%                 | 59%            | 74%        | 36%            | 70%          |
| <b>mean.all.nb./Locus</b>        | 17.8               | 6.4                 | 6              | 24.3       | 3.4            | 25.7         |
| <b>mean.all.nb./Loc./sp.</b>     | 3.7                | 3.3                 | 2.4            | 3.7        | 1.6            | 3.2          |

405

406

407

408  
409  
410

**Table S3** Number and percentage of shared alleles between species by taxonomic groups (genus, tribe & total of species), calculated per locus and in average over all loci (calcul of percentage excludes null alleles).

| Taxonomic groups<br>Locus | <i>Oreochromis</i>         | <i>Sarotherodon</i> | <i>Tilapia</i> | Tilapiines    | non-Tilapiines | Total         |
|---------------------------|----------------------------|---------------------|----------------|---------------|----------------|---------------|
| UNH-008                   | # all. 6<br>% all. 37.5%   | 1<br>16.7%          | 1<br>100%      | 3<br>15%      | 0<br>0%        | 2<br>9.10%    |
| UNH-102                   | # all. 9<br>% all. 56.3%   | 1<br>20%            | N<br>-         | 4+N<br>23.50% | 0<br>0%        | 2+N<br>10.50% |
| UNH-103                   | # all. 9<br>% all. 33.3%   | 0<br>0%             | N<br>-         | 4<br>12.9%    | N<br>-         | N<br>0%       |
| UNH-106                   | # all. 5<br>% all. 25%     | 1<br>16.70%         | 0<br>0%        | 5<br>17.90%   | 0<br>0%        | 6+N<br>20%    |
| UNH-115                   | # all. 7<br>% all. 58.3%   | 1<br>25%            | 1<br>33.3%     | 3<br>21.4%    | 0<br>0%        | 1<br>6.7%     |
| UNH-117                   | # all. 1<br>% all. 50%     | 0<br>0%             | 1<br>50%       | 1<br>16.70%   | 0<br>0%        | 0<br>0%       |
| UNH-123                   | # all. 5+N<br>% all. 25%   | 0<br>0%             | 1<br>50%       | 4+N<br>17.4%  | 0<br>0%        | 0<br>0%       |
| UNH-124                   | # all. 3+N<br>% all. 50%   | 1<br>20%            | N<br>0%        | 1+N<br>8.30%  | N<br>-         | N<br>0%       |
| UNH-125                   | # all. N<br>% all. 0%      | 0<br>0%             | 1<br>20%       | 4+N<br>25%    | N<br>0%        | N<br>0%       |
| UNH-129                   | # all. 7<br>% all. 43.80%  | 0<br>0%             | N<br>-         | 3+N<br>15.80% | 0<br>0%        | 3+N<br>14.30% |
| UNH-130                   | # all. 6+N<br>% all. 31.6% | 0<br>0%             | 1<br>25%       | 4+N<br>16%    | N<br>0%        | 1+N<br>3.8%   |
| UNH-132                   | # all. 3<br>% all. 25%     | 0<br>0%             | N<br>-         | 2+N<br>14.30% | N<br>-         | N<br>0%       |
| UNH-135                   | # all. 9<br>% all. 39.1%   | 0<br>0%             | 1<br>12.5%     | 4<br>12.1%    | N<br>-         | 0<br>0%       |
| UNH-138                   | # all. 9<br>% all. 36%     | 0<br>0%             | 1<br>9.1%      | 1<br>2.6%     | N<br>0%        | 1<br>2.6%     |
| UNH-142                   | # all. 9<br>% all. 60%     | 1<br>25%            | 1<br>14.3%     | 8<br>44.4%    | 0<br>0%        | 3+N<br>16.7%  |
| UNH-146                   | # all. 6+N<br>% all. 66.7% | 1<br>20%            | 1<br>25%       | 2<br>12.5%    | N<br>0%        | 1+N<br>6.3%   |
| UNH-149                   | # all. 7<br>% all. 36.8%   | 0<br>0%             | 2<br>14.3%     | 7<br>22.6%    | 2<br>33.3%     | 6<br>19.4%    |
| UNH-154                   | # all. 8<br>% all. 28.6%   | 2<br>25%            | 1<br>16.70%    | 7<br>21.90%   | 0<br>0%        | 2+N<br>6.10%  |
| UNH-159                   | # all. 8<br>% all. 47.1%   | 1<br>14.3%          | 0<br>0%        | 6<br>23.1%    | 0<br>0%        | 0<br>0%       |
| UNH-162                   | # all. 10<br>% all. 45.5%  | 0<br>0%             | 2<br>20%       | 4<br>11.80%   | 0<br>0%        | 3<br>8.60%    |
| UNH-169                   | # all. 9<br>% all. 32.1%   | 2<br>28.6%          | 1<br>50%       | 6<br>19.4%    | 1<br>33.3%     | 3<br>9.7%     |
| UNH-173                   | # all. 3<br>% all. 30%     | 0<br>0%             | 1<br>20%       | 1<br>5.90%    | N<br>-         | N<br>0%       |
| UNH-174                   | # all. 3<br>% all. 30%     | 1<br>33.3%          | 1<br>25%       | 6<br>54.5%    | N<br>0%        | N<br>0%       |
| UNH-189                   | # all. 6<br>% all. 28.60%  | 0<br>0%             | 1<br>8.30%     | 5<br>13.90%   | N<br>0%        | 1+N<br>2.70%  |
| UNH-190                   | # all. 2<br>% all. 14.3%   | 0<br>0%             | N<br>0%        | 3<br>16.7%    | 0<br>0%        | 1+N<br>5.3%   |
| UNH-197                   | # all. 6<br>% all. 24%     | 0<br>0%             | N<br>0%        | 12<br>33.30%  | N<br>0%        | 3+N<br>7.90%  |
| UNH-207                   | # all. 4<br>% all. 30.8%   | 0<br>0%             | 1<br>11.1%     | 7<br>30.4%    | 0<br>0%        | N<br>0%       |
| UNH-211                   | # all. 9<br>% all. 37.50%  | 1<br>9.10%          | 2<br>40%       | 9<br>29%      | N<br>-         | 0<br>0%       |
| UNH-216                   | # all. 9<br>% all. 50%     | 1<br>14.30%         | 3<br>27.30%    | 9<br>36%      | N<br>0%        | 1+N<br>3.40%  |
| <b>Average per locus</b>  | # all. 6.14<br>% all. 37%  | 0.52<br>9.2%        | 0.86<br>19.7%  | 4.66<br>20.5% | 0.1<br>2.3%    | 1.38<br>5.3%  |

411
